# Supplementary material
Source: publisher site journal article supplement (https://static.cambridge.org/content/id/urn:cambridge.org:id:article:S1047951121001414/resource/name/S1047951121001414supp003.docx)
Supplement: Supplementary file 1 [file S1047951121001414supp003.docx]

**Supplementary ~~Material~~ Table ~~5~~ 4.** Blood gas analyses for stratified groups.

|  | ***Intraoperative*** | | | ***Postoperative (ICU)*** | | |
| --- | --- | --- | --- | --- | --- | --- |
|  | ***MAP<40 mmHg***  ***n=33*** | ***MAP>40 mmHg***  ***n=25*** | ***p-value*** | ***MAP<40 mmHg***  ***n=33*** | ***MAP>40 mmHg***  ***n=25*** | ***p-value*** |
| **pH** |  |  |  |  |  |  |
| Low | 7.34 (7.20-7.40) | 7.33 (7.24-7.40) | 0.894 | 7.34 (7.10-7.45) | 7.32 (7.23-7.39) | 0.894 |
| High | 7.49 (7.39-7.62) | 7.47 (7.38-7.63) | 0.110 | 7.44 (7.35-7.90) | 7.42 (7.35-7.56) | 0.110 |
| **pCO2 (kPa)** |  |  |  |  |  |  |
| Low | 3.70 (2.46-4.77) | 3.99 (2.39-5.24) | 0.027 | 4.23 (3.37-5.60) | 4.41 (3.20-5.44) | 0.523 |
| High | 5.65 (3.94-8.07) | 5.68 (4.47-6.81) | 0.863 | 5.70 (5.56-8.02) | 5.97 (4.89-7.18) | 0.275 |
| **pO2 (kPa)** |  |  |  |  |  |  |
| Low | 12.9 (4.6-23.3) | 14.3 (6.4-22.0) | 0.432 | 11.6 (7.6-28.9) | 11.7 (6.0-19.0) | 0.865 |
| High | 54.2 (25.8-79.5) | 55.2 (17.5-73.8) | 0.863 | 27.4 (14.9-40.1) | 26.6 (11.5-60.6) | 0.949 |
| **Hemoglobin (mmol/L)** |  |  |  |  |  |  |
| Low | 5.6 (3.2-6.5) | 5.6 (2.8-7.2) | 0.450 | 6.9 (5.2-8.4) | 6.8 (5.7-7.8) | 0.437 |
| High | 7.2 (5.7-8.7) | 7.5 (6.2-8.4) | 0.404 | 7.9 (6.7-9.3) | 7.9 (6.7-9.0) | 0.865 |
| **Base excess** |  |  |  |  |  |  |
| Low | -4.0 ((-9.4)-(-0.9)) | -3.8 ((-9.8)-(0.8)) | 0.643 | -4.1 ((-8.4)- (2.8)) | -4.4((-9.8)-(-3.6)) | 0.308 |
| High | -0.3 ((-3.0)-(5.6)) | -0.1((-3.4)-(5.0)) | 0.759 | 0.2 ((-5.4)-(6.1)) | 0.6 ((-3.4)-(5.3)) | 0.477 |
| **HCO3- (mmol/L)** |  |  |  |  |  |  |
| Low | 20.9 (16.9-23.7) | 21.1 (16.6-24.9) | 0.832 | 20.8 (16.6-26.3) | 20.3 (16.7-26.6) | 0.162 |
| High | 23.6 (20.7-29.9) | 24.1 (21.5-34.4) | 0.820 | 24.8 (19.2-36.9) | 24.3 (21.2-29.3) | 0.929 |
| **Glucose (mmol/L)** |  |  |  |  |  |  |
| Low | - | - |  | 6.0 (2.7-11.0) | 6.8 (3.6-8.2) | 0.212 |
| High | - | - |  | 9.1 (5.1-22.4) | 10.0 (6.8-16.7) | 0.208 |
| **Lactate (mmol/L)** |  |  |  |  |  |  |
| Low | - | - |  | 0.8 (0.7-1.7) | 0.8 (0.6-1.1) | 0.280 |
| High | - | - |  | 2.0 (1.0-3.4) | 1.5 (0.6-2.0) | 0.127 |
| **ScvO2 (%)** |  |  |  |  |  |  |
| Low | 63.5 (33.1-81.4) | 65.3 (49.5-73.1) | 0.791 | - | - | - |
| High | 77.5 (54.0-91.0) | 79.4 (60.1-93.2) | 0.441 | - | - | - |

Numbers are presented as medians with total range of lowest and highest values.

Postoperative period was defined from transfer from the operating room to discharge from the intensive care unit.

ICU, intensive care unit; MAP, mean arterial pressure; ScvO2, Central venous oxygen saturation.
